# Supplementary material
Source: publisher figshare collection journal article supplement (https://sage.figshare.com/ndownloader/files/18109844)
Supplement: Supplementary file 1 [file 18109844]

## APPENDIX 1: Survey Items.

| Constructs and Items*                                                                                                                    | Mean | SD   | Skew  | Kurt  |
|------------------------------------------------------------------------------------------------------------------------------------------|------|------|-------|-------|
| Think about South Korea as a country and evaluate its overall national image (1=Extremely negative; 7=Extremely positive). CI            | 4.03 | 1.48 | -0.26 | -0.25 |
| On a scale of 1 (very bad) to 10 (very good), how would you evaluate the current relationship between China and South Korea? REL         | 4.37 | 2.06 | 0.28  | -0.28 |
| <b>National Attachment (<math>\alpha=.859</math>)</b>                                                                                    |      |      |       |       |
| To live in China means a lot to me. ATT1                                                                                                 | 6.22 | 1.34 | -1.99 | 3.84  |
| I am proud to live in China. ATT2                                                                                                        | 6.19 | 1.39 | -1.95 | 3.51  |
| I feel a strong connection with my country China. ATT3                                                                                   | 6.19 | 1.39 | -2.01 | 3.80  |
| <b>Consumer Ethnocentrism (<math>\alpha=.918</math>)</b>                                                                                 |      |      |       |       |
| Chinese people should always buy products made in China instead of imports. CE1                                                          | 3.92 | 1.99 | 0.03  | -1.08 |
| We should buy from foreign countries only those products that we cannot obtain within our own country. CE2                               | 4.10 | 1.84 | -0.09 | -0.84 |
| Purchasing foreign-made products is not patriotic. CE3                                                                                   | 3.71 | 1.99 | 0.09  | -1.11 |
| It is not right to buy foreign products, because it puts Chinese out of jobs. CE4                                                        | 3.09 | 1.80 | 0.39  | -0.82 |
| We should buy products made in China, instead of letting other countries get rich off us. CE5                                            | 4.24 | 1.85 | -0.21 | -0.85 |
| A real Chinese should always buy Chinese-made products. CE6                                                                              | 2.90 | 1.86 | 0.58  | -0.68 |
| <b>National Animosity (<math>\alpha=.873</math>)</b>                                                                                     |      |      |       |       |
| South Korea is an unreliable partner. NAN1                                                                                               | 5.58 | 1.82 | -1.11 | 0.14  |
| South Korea has never been honest with China. NAN2                                                                                       | 4.66 | 1.72 | -0.35 | -0.52 |
| South Korea is a friend of China only in good times. NAN3                                                                                | 4.44 | 1.74 | -0.13 | -0.70 |
| South Korea's deployment of THAAD is provoking to China. NAN4                                                                            | 4.40 | 1.70 | -0.16 | -0.63 |
| South Korea blames China wrongly for their tensions with North Korea. NAN5                                                               | 4.91 | 1.65 | -0.45 | -0.40 |
| South Korea is increasingly unfriendly to China. NAN6                                                                                    | 4.89 | 1.85 | -0.56 | -0.55 |
| I support the anti-THAAD issued by the Chinese government. NAN7 <sup>a</sup>                                                             | 5.86 | 1.64 | -1.42 | 1.21  |
| <b>General Animosity (<math>\alpha=.854</math>)</b>                                                                                      |      |      |       |       |
| I feel resentful to South Korea. GAN1                                                                                                    | 4.20 | 1.86 | -0.08 | -0.80 |
| I dislike South Korea. GAN2                                                                                                              | 4.31 | 1.87 | -0.11 | -0.86 |
| I do not want to be friends with people from South Korea. GAN3                                                                           | 3.59 | 2.00 | 0.25  | -1.03 |
| <b>Dependent Variables</b>                                                                                                               |      |      |       |       |
| On a scale of 1 (very low) to 10 (very high), what is your intention to visit South Korea as a tourist in the next 3 years? VIG          | 4.34 | 2.70 | 0.45  | -0.77 |
| On a scale of 1 (very low) to 10 (very high), what is your intention to visit South Korea for a special event (e.g., Olympic Games)? VIE | 3.40 | 2.45 | 0.86  | -0.15 |
| If the relationship between the two governments improves, I would be more willing to visit South Korea in the next 3 years. VIC          | 4.35 | 1.93 | -0.31 | -0.90 |

\* If not indicated otherwise, the items are measure on the 7-point Likert scale (1=Strongly disagree, 7=Strongly agree).

<sup>a</sup> Not included in the scale.

## APPENDIX 2. Animosity toward South Korea: EFA.

| Chinese International Tourists, N = 532             |       |       |      |
|-----------------------------------------------------|-------|-------|------|
| Items <sup>a</sup>                                  | F1    | F2    | Com. |
| Eigenvalue                                          | 4.93  | 1.15  |      |
| Variance, %                                         | 54.81 | 12.77 |      |
| AVE                                                 | 0.58  | 0.72  |      |
| Cronbach's alpha                                    | 0.87  | 0.85  |      |
| F1: National animosity                              |       |       |      |
| SK is a friend of China only in good times.         | 0.83  |       | 0.62 |
| SK deployment of THAAD is provoking to China.       | 0.81  |       | 0.56 |
| SK has never been honest with China.                | 0.76  |       | 0.69 |
| SK is an unreliable partner.                        | 0.76  |       | 0.65 |
| SK is increasingly unfriendly to China.             | 0.70  |       | 0.67 |
| SK blames China wrongly for their tensions with NK. | 0.69  |       | 0.56 |
| F2: General animosity                               |       |       |      |
| I do not want to be friends with people from SK.    |       | 0.93  | 0.78 |
| I dislike SK.                                       |       | 0.85  | 0.79 |
| I feel resentful to SK.                             |       | 0.77  | 0.77 |

Principle Component Analysis; KMO: 0.89; Bartlett's test: Chi-Sq=2606.72, df=36, p<0.001; Rotation: Oblimin; Total variance explained: 67.59%, Rotation converged in 5 iterations.

<sup>a</sup> Formulations are altered slightly for formatting purposes.

### APPENDIX 3. Study constructs: CFA.

| Constructs and Items                                                                                       | Std.<br>Load. | t-<br>value | AVE  | CCR  |
|------------------------------------------------------------------------------------------------------------|---------------|-------------|------|------|
| <b>Consumer Ethnocentrism (<math>\alpha=0.918</math>)</b>                                                  |               |             | 0.65 | 0.92 |
| Chinese people should always buy products made in China instead of imports. CE1                            | 0.79          | fixed       |      |      |
| We should buy from foreign countries only those products that we cannot obtain within our own country. CE2 | 0.84          | 21.90       |      |      |
| Purchasing foreign-made products is not patriotic. CE3                                                     | 0.92          | 24.48       |      |      |
| It is not right to buy foreign products, because it puts Chinese out of jobs. CE4                          | 0.80          | 20.50       |      |      |
| We should buy products made in China, instead of letting other countries get rich off us. CE5              | 0.75          | 18.81       |      |      |
| A real Chinese should always buy Chinese-made products. CE6                                                | 0.74          | 18.34       |      |      |
| <b>National Attachment (<math>\alpha=0.859</math>)</b>                                                     |               |             | 0.67 | 0.86 |
| To live in China means a lot to me. ATT1                                                                   | 0.82          | 18.40       |      |      |
| I am proud to live in China. ATT2                                                                          | 0.88          | 18.96       |      |      |
| I feel a strong connection with my country China. ATT3                                                     | 0.76          | fixed       |      |      |
| <b>National Animosity (<math>\alpha=0.873</math>)</b>                                                      |               |             | 0.54 | 0.87 |
| South Korea is an unreliable partner. NAN1                                                                 | 0.79          | 15.91       |      |      |
| South Korea has never been honest with China. NAN2                                                         | 0.83          | 16.52       |      |      |
| South Korea is a friend of China only in good times. NAN3                                                  | 0.72          | 14.66       |      |      |
| South Korea's deployment of THAAD is provoking to China. NAN4                                              | 0.61          | 12.73       |      |      |
| South Korea blames China wrongly for their tensions with North Korea. NAN5                                 | 0.67          | fixed       |      |      |
| South Korea is increasingly unfriendly to China. NAN6                                                      | 0.77          | 15.50       |      |      |
| <b>General Animosity (<math>\alpha=0.854</math>)</b>                                                       |               |             | 0.66 | 0.85 |
| I feel resentful to South Korea. GAN1                                                                      | 0.84          | fixed       |      |      |
| I dislike South Korea. GAN2                                                                                | 0.84          | 21.33       |      |      |
| I do not want to be friends with people from South Korea. GAN3                                             | 0.76          | 19.02       |      |      |
